# Supplementary material for: Cystic fibrosis swine fail to secrete airway surface liquid in response to inhalation of pathogens
Source: PubMed Central journal article supplement (PMC5629252; doi:10.1038/s41467-017-00835-7), 2017-10-05
Supplement: 41467_2017_835_MOESM1_ESM.pdf [file 41467_2017_835_MOESM1_ESM.pdf]

### **Description of Supplementary Files**

File name: Supplementary Information

Description: Supplementary figures and supplementary tables.

File name: Peer review file

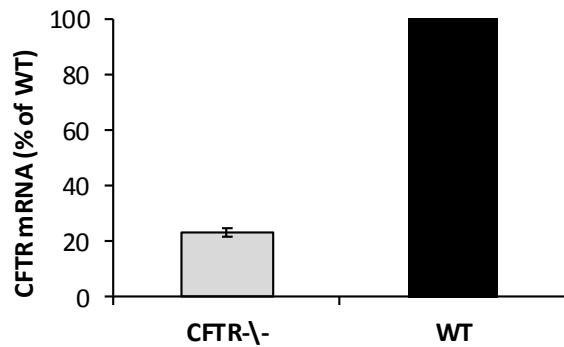

Supplementary Figure 1: CFTR mRNA levels (relative to *β-actin*) in CF gut corrected (CFTR<sup>-/-</sup>) and Wild-type (WT) pigs. Values are shown as percentage mRNA levels relative to the wild-type. Samples were run in quadruplicates. qPCR results showed that CFTR mRNA levels (normalized to *β-actin*) in the gut of pig#7 was 23.29% that of wild-type, which is consistent with what has been previously reported<sup>29</sup>.

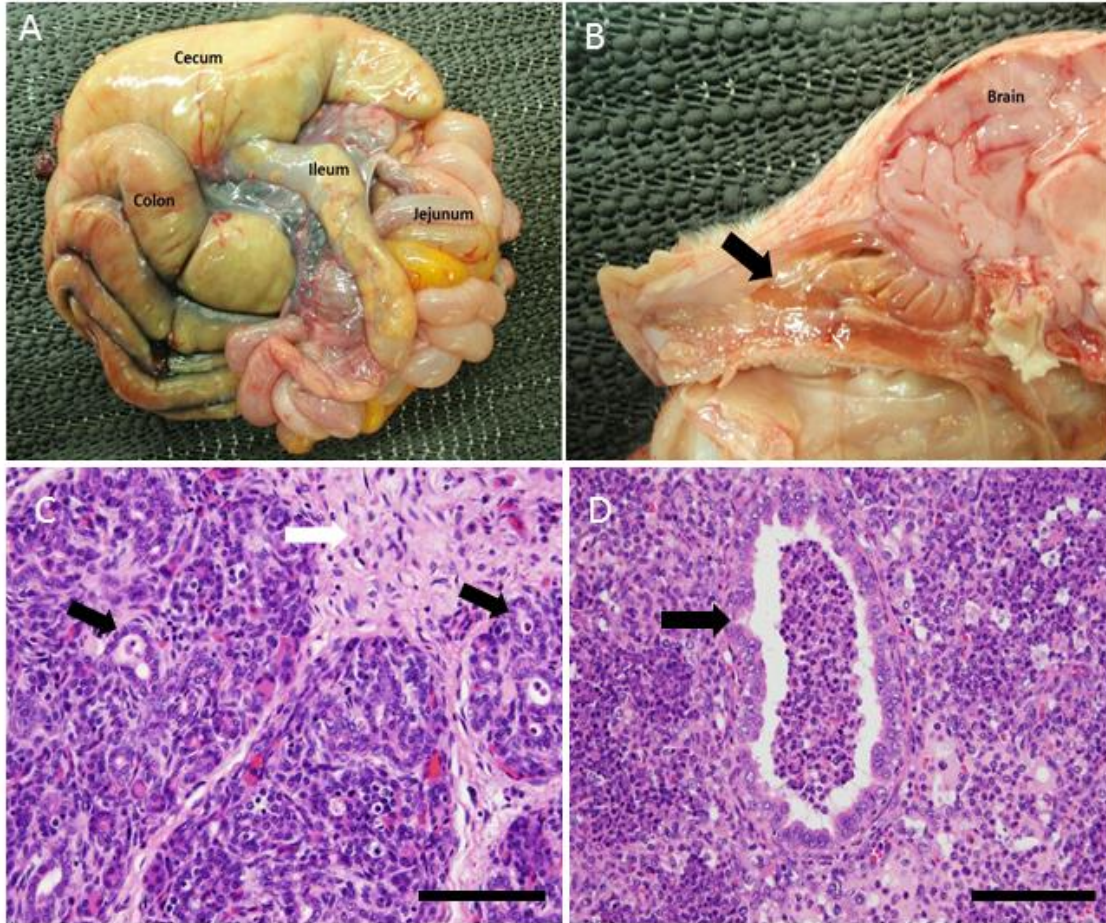

Supplementary Figure 2: Pathology analysis of gut-corrected  $CFTR^{-/-}$  swine. The carcasses of 10 animals were subjected to pathology analyses by a board-certified veterinary pathologist. A) Intestines: The cecum and spiral colon are severely distended by feces. B) Head: The nasal cavity contains excessive mucous (arrow). C) Pancreas: The acini (black arrows) are mostly devoid of zymogen granules, and the interstitium contain increase amount of fibrous tissues (white arrows). D) Lung: The bronchiole (arrow) and alveoli are filled with many inflammatory cells, mostly neutrophils. Scale bars indicate 100  $\mu$ m.

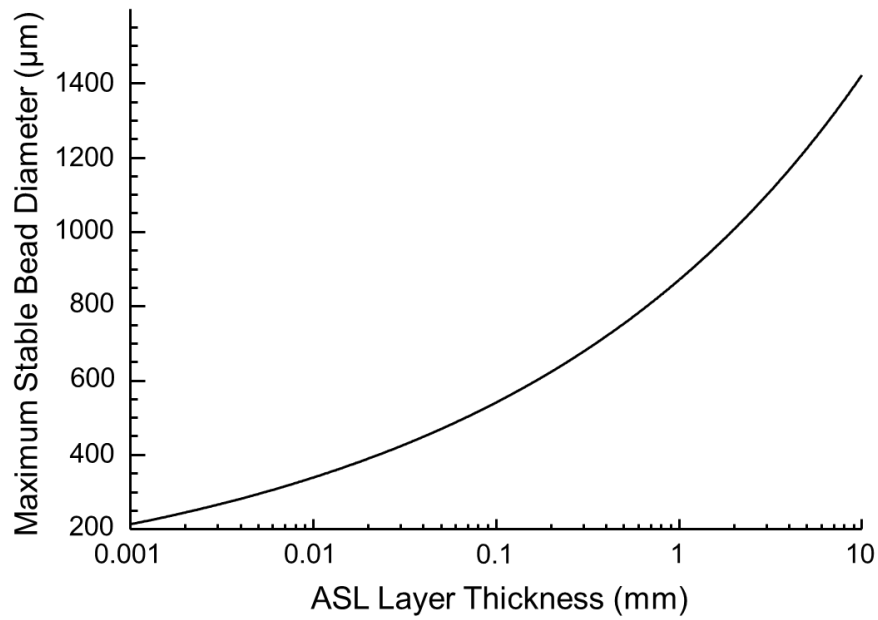

Supplementary Figure 3: Maximum diameter of beads that will be forced against the epithelium at the top of the trachea at a given range of ASL layer thickness. The data shows the change in adhesion force, within the range of ASL thickness (20 to 300 µm) observed in swine trachea, , with varying bead size and fluid thickness as calculated from equation 5.

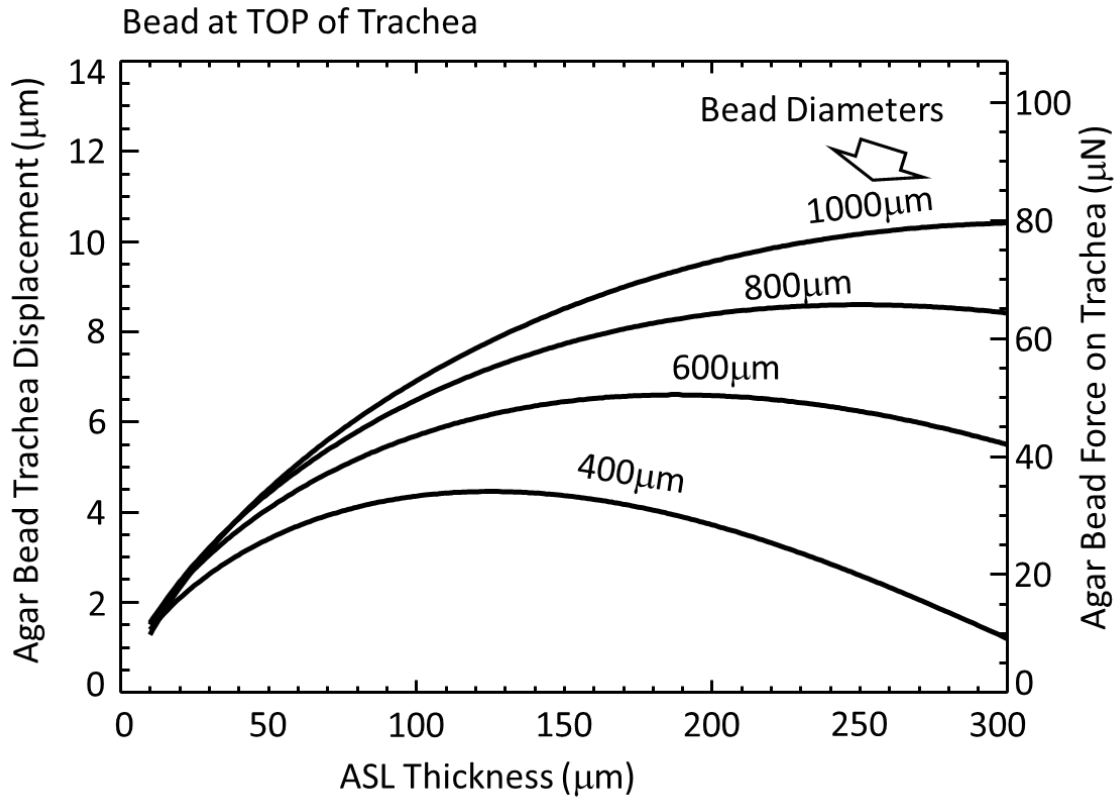

Supplementary Figure 4: Tissue deformation in the top part of the trachea for given ASL thicknesses and bead diameters. The displacement of tracheal epithelium by beads of varying sizes and under varying ASL layer thicknesses can be calculated from equation #6 . Tissue displacement is negligible compared to the height of the ASL layer in live swine trachea.

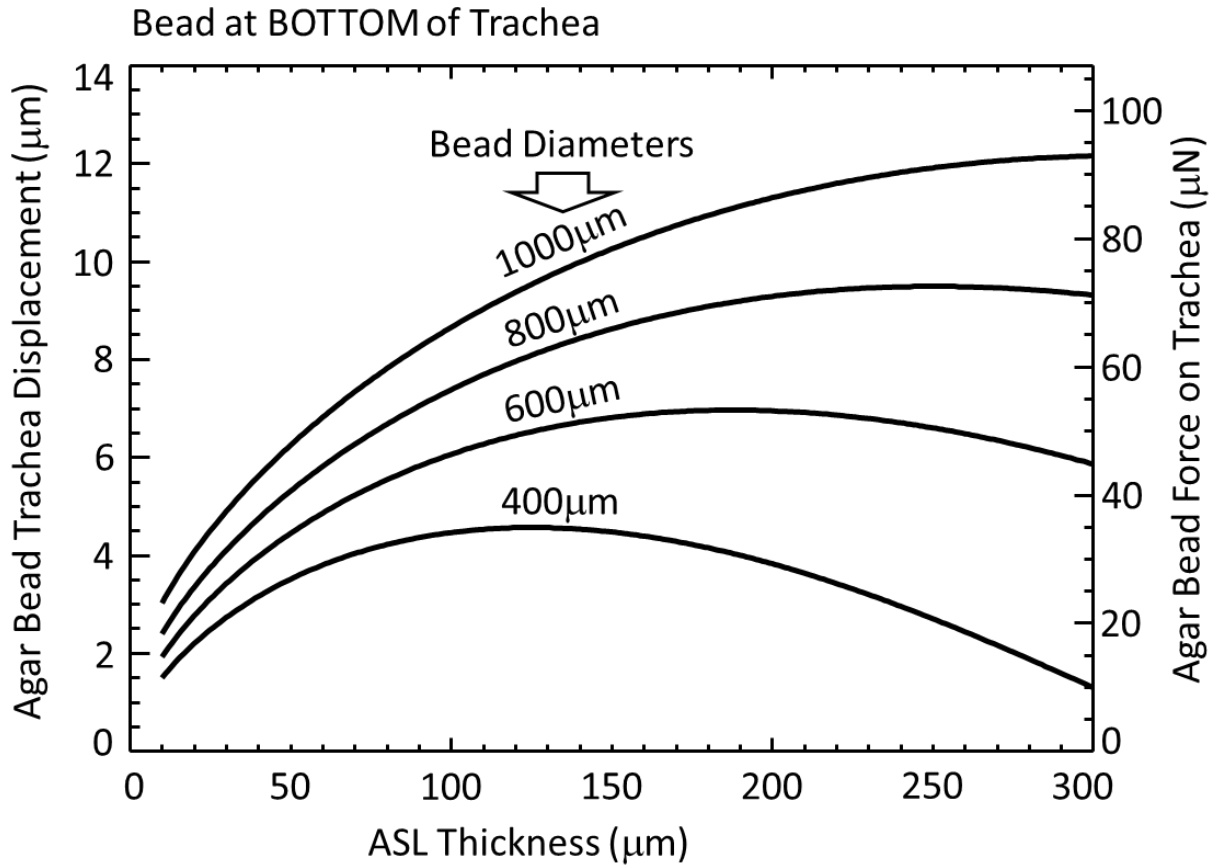

Supplementary Figure 5: Tissue deformation of the bottom part of the trachea for given ASL thicknesses and bead diameters. The displacement of tracheal epithelium by beads of varying sizes and under varying ASL layer thicknesses can be calculated from equation #6 . Tissue displacement is negligible compared to the height of the ASL layer in live swine trachea.

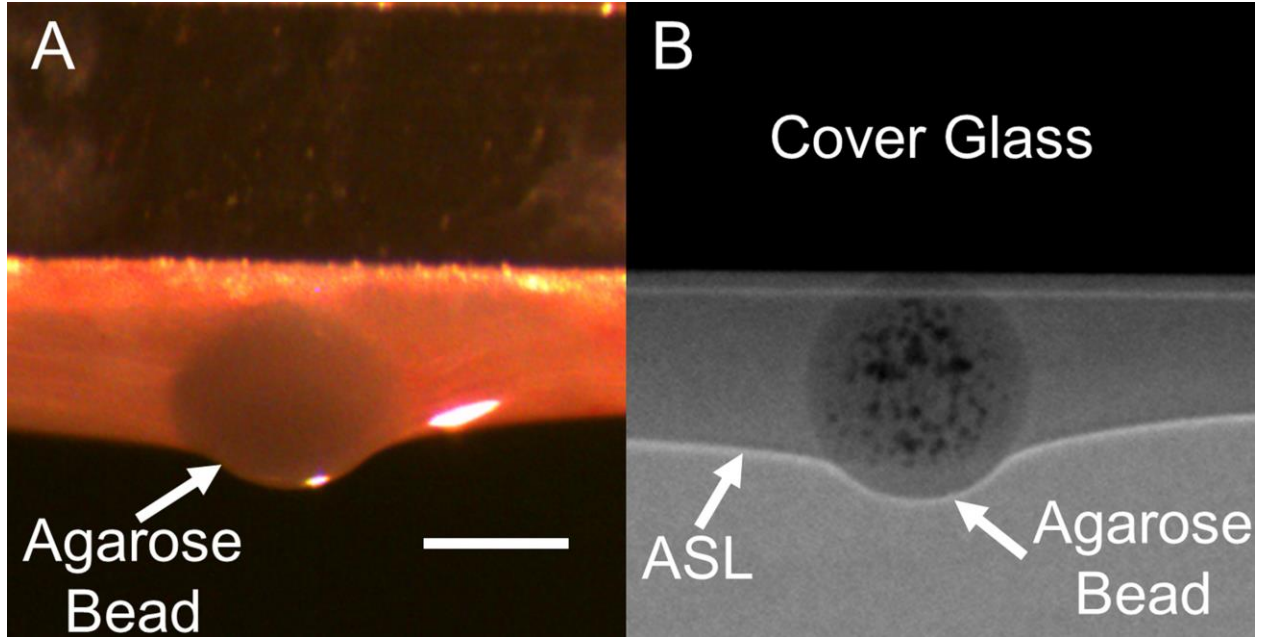

Supplementary Figure 6: Surface tension force the beads against the glass slide. We placed agarose beads in an ASL sample collected from isolated trachea and placed it on the underside of a glass slide. The agarose beads were forced against the glass surface, indicating that the surface tension from the ASL is stronger than gravity and it forces the beads up against the glass surface, as predicted by the mathematical model A) Light, and B) phase contrast images of the same bead immersed in ASL<sup>18</sup>. Scale bar represents 500  $\mu\text{m}$ .

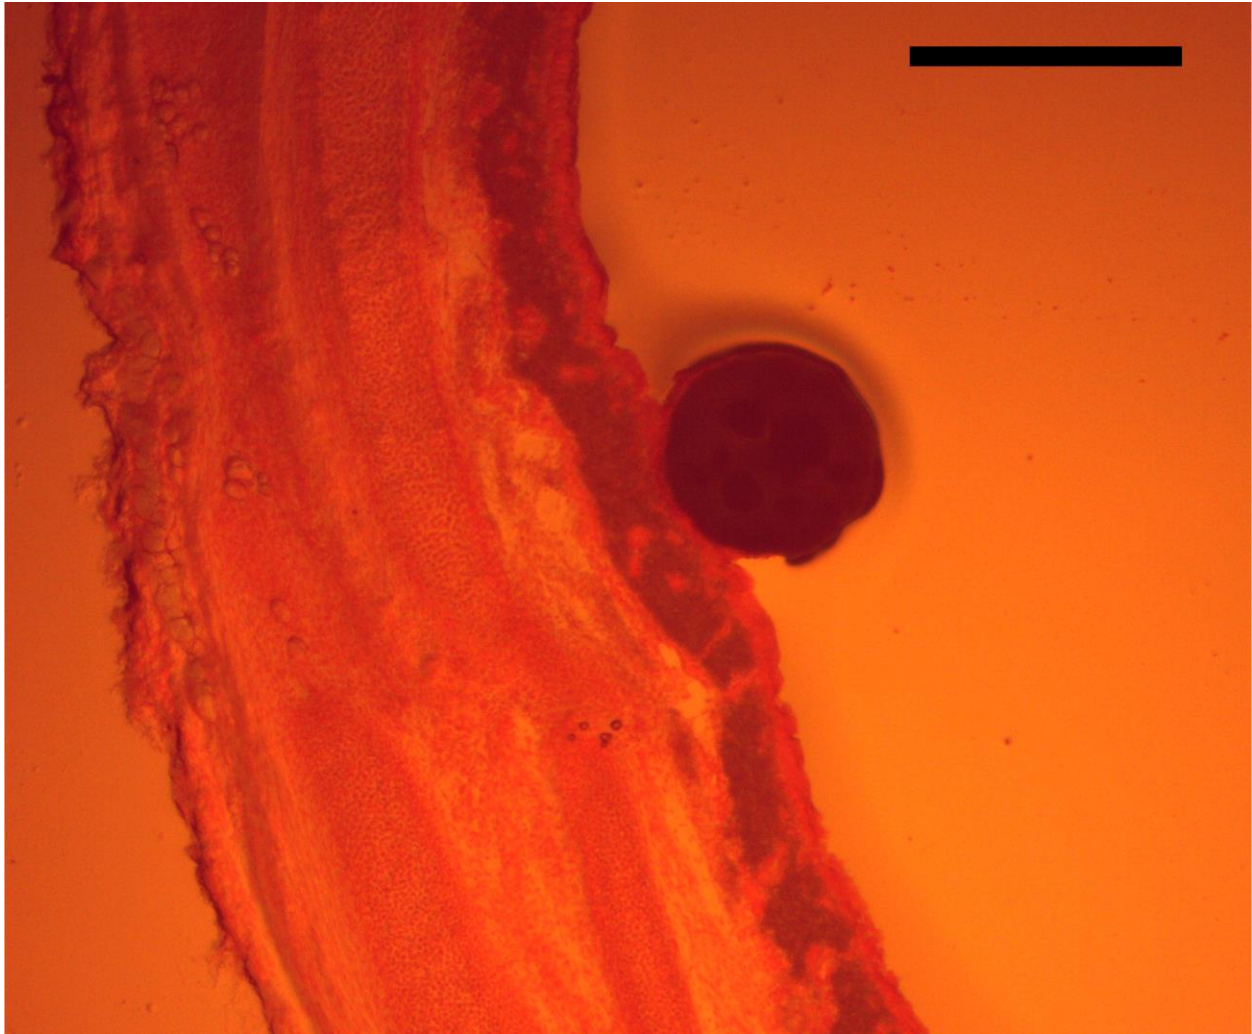

Supplementary Figure 7: Cryo-section of a tracheal preparation showing an agarose bead in contact with airway surface epithelia. Agarose beads were instilled into freshly harvested trachea of 1 week old wild-type piglets. The preparations were flash frozen in liquid nitrogen and stored at  $-80^{\circ}\text{C}$ . Then, the trachea preparations were cryo-sectioned into  $20\ \mu\text{m}$  sections and stained with Nuclear Fast Red (Sigma) for 1 minute, which delineated the airway tissue. The sections were imaged on a light microscope. Histological images ( $n=11$ ) clearly showed that the agarose beads were indeed in contact with the airway surface epithelium. Scale bar represents  $500\ \mu\text{m}$ .



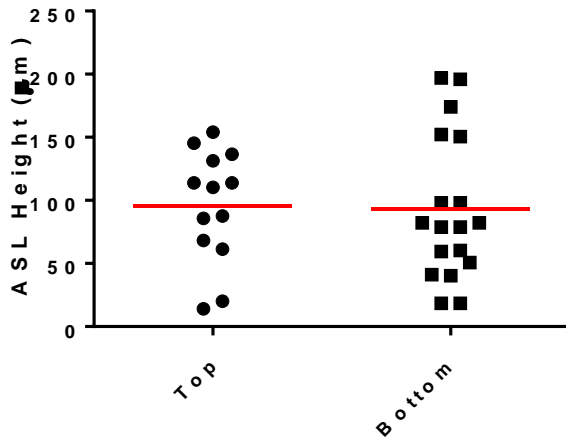

Supplementary Figure 8: Scatterplot and mean (red lines) ASL height measured with beads placed at the top and bottom parts of live swine trachea (n = 13 for top and n = 18 for bottom; t = 0.1239, df = 29, p = 0.90, Students' t-test).

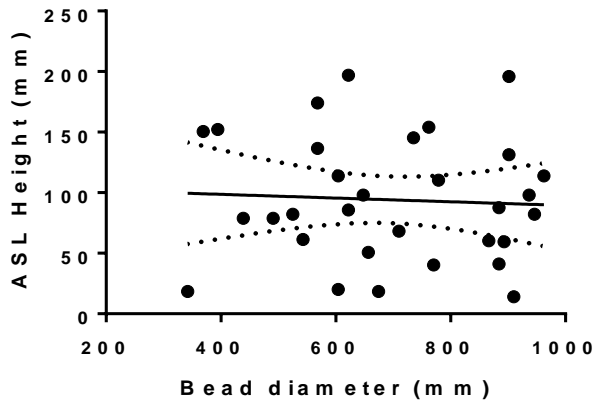

Supplementary Figure 9: Scatterplot and linear regression of bead diameter vs ASL height measured 5 min after incubating tissues with bacteria-free beads. The linear regression was not significant ( $p = 0.77$ ,  $F = 0.087$ ,  $DFn = 1$ ,  $DFd = 29$ ;  $r^2 = 0.003$ )

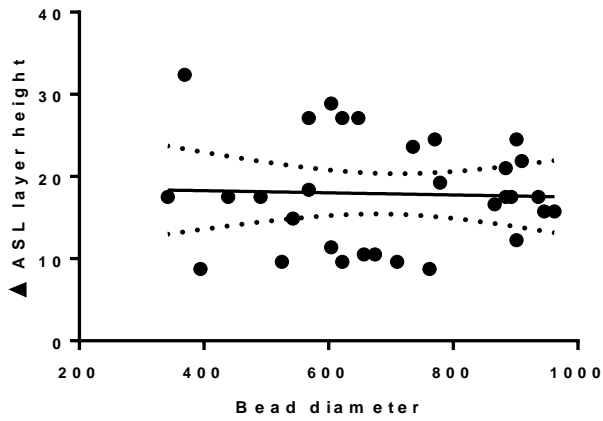

Supplementary Figure 10: Scatterplot and linear regression of bead diameter vs change in ASL height after 30 min of incubation with bacteria-free beads. The linear regression was not significant ( $p = 0.84$ ,  $F = 0.038$ ,  $DFn = 1$ ,  $DFd = 29$ ;  $r^2 = 0.001$ ).

Supplementary Table 1: Summary of clinical histories of the gut-corrected CFTR<sup>-/-</sup> piglets.

| Pig# | Vital signs at birth |     |                |      | Treatments<br>some offered more than once   | Euthanasia |          |
|------|----------------------|-----|----------------|------|---------------------------------------------|------------|----------|
|      | Wt                   | HR  | O <sub>2</sub> | Temp |                                             | Age        | Reason   |
| 1    | 1.13                 | 158 | 99             | 37.6 | 1ml enema (oil)                             | 7 days     | elective |
| 2    | 1.43                 | 172 | 99             | 37.8 | 2.5ml enema (water-oil)                     | 5 days     | IC, RS.  |
| 3    | 1.14                 | 149 | 96             | 36.7 | 5% dextrose IP 5cc                          | 2 days     | IC       |
| 4    | 1.47                 | 136 | 96             | 35.6 | 5% dextrose IP 5cc                          | 2 days     | IC       |
| 5    | 1.18                 | 153 | 90             | 36.9 | 5% dextrose IP 5cc, 2.5ml enema (water-oil) | 2 days     | IC       |
| 6    | 1.47                 | 176 | 92             | 38.2 | 1ml enema (oil)                             | 5 days     | IC, RS.  |
| 7    | 1.25                 | 193 | 95             | 37.2 | 5% dextrose IP 5cc, 2.5ml enema (water-oil) | 2 days     | RS       |
| 8    | 1                    | 198 | 88             | 37.7 | 2.5ml enema (water-oil)                     | 5 days     | IC       |
| 9    | 1.37                 | 170 | 85             | 37.8 | 1.5 ml enema (oil)                          | 7 days     | elective |
| 10   | 1.55                 | 171 | 93             | 37.3 | 2.5ml enema (water-oil)                     | 2 days     | IC       |
| 11   | 1.26                 |     |                |      |                                             | 12 h       | RS       |

Wt- Weight kg. HR- Heart rate. O<sub>2</sub>- % oxygen saturation. Temp- Temperature in degree Celsius. IC- Intestinal complications. RS- Respiratory Symptoms.

Supplementary Table 2: Summary of gross and histological findings

| Pig ID | Distended colon and cecum with firmer than normal feces | Hypoplastic gall bladder | Common bile duct blocked by thick bile | Suppurative pneumonia | Notable excessive mucous in nasal cavity | Prominent bile stasis | Pancreatic hypoplasia |
|--------|---------------------------------------------------------|--------------------------|----------------------------------------|-----------------------|------------------------------------------|-----------------------|-----------------------|
| 1      | -                                                       | +                        | -                                      | +                     | -                                        | -                     | NA                    |
| 2      | +                                                       | +                        | -                                      | +                     | -                                        | +                     | NA                    |
| 3      | NA                                                      | NA                       | NA                                     | NA                    | NA                                       | NA                    | NA                    |
| 4      | +                                                       | -                        | -                                      | -                     | -                                        | -                     | NA                    |
| 5      | +                                                       | +                        | -                                      | -                     | -                                        | -                     | NA                    |
| 6      | +                                                       | -                        | -                                      | +                     | -                                        | -                     | NA                    |
| 7      | -                                                       | -                        | -                                      | -                     | -                                        | -                     | NA                    |
| 8      | +                                                       | +                        | -                                      | -                     | +                                        | +                     | +                     |
| 9      | -                                                       | +                        | -                                      | +                     | +                                        | -                     | NA                    |
| 10     | +                                                       | -                        | +                                      | -                     | -                                        | +                     | NA                    |
| 11     | +                                                       | -                        | -                                      | -                     | -                                        | -                     | +                     |

+: present, -: absent, **NA**: observation not available
